# Supplementary material for: Genome-wide CRISPR screen identifies TMEM41B as a gene required for autophagosome formation
Source: PubMed Central journal article supplement — J Cell Biol. 2018 Nov 5;217(11):3817–28. doi: 10.1083/jcb.201804132 (PMC6219718; doi:10.1083/jcb.201804132), 2018-11-05
Supplement: JCB_201804132_sm.pdf [file JCB_201804132_sm.pdf]

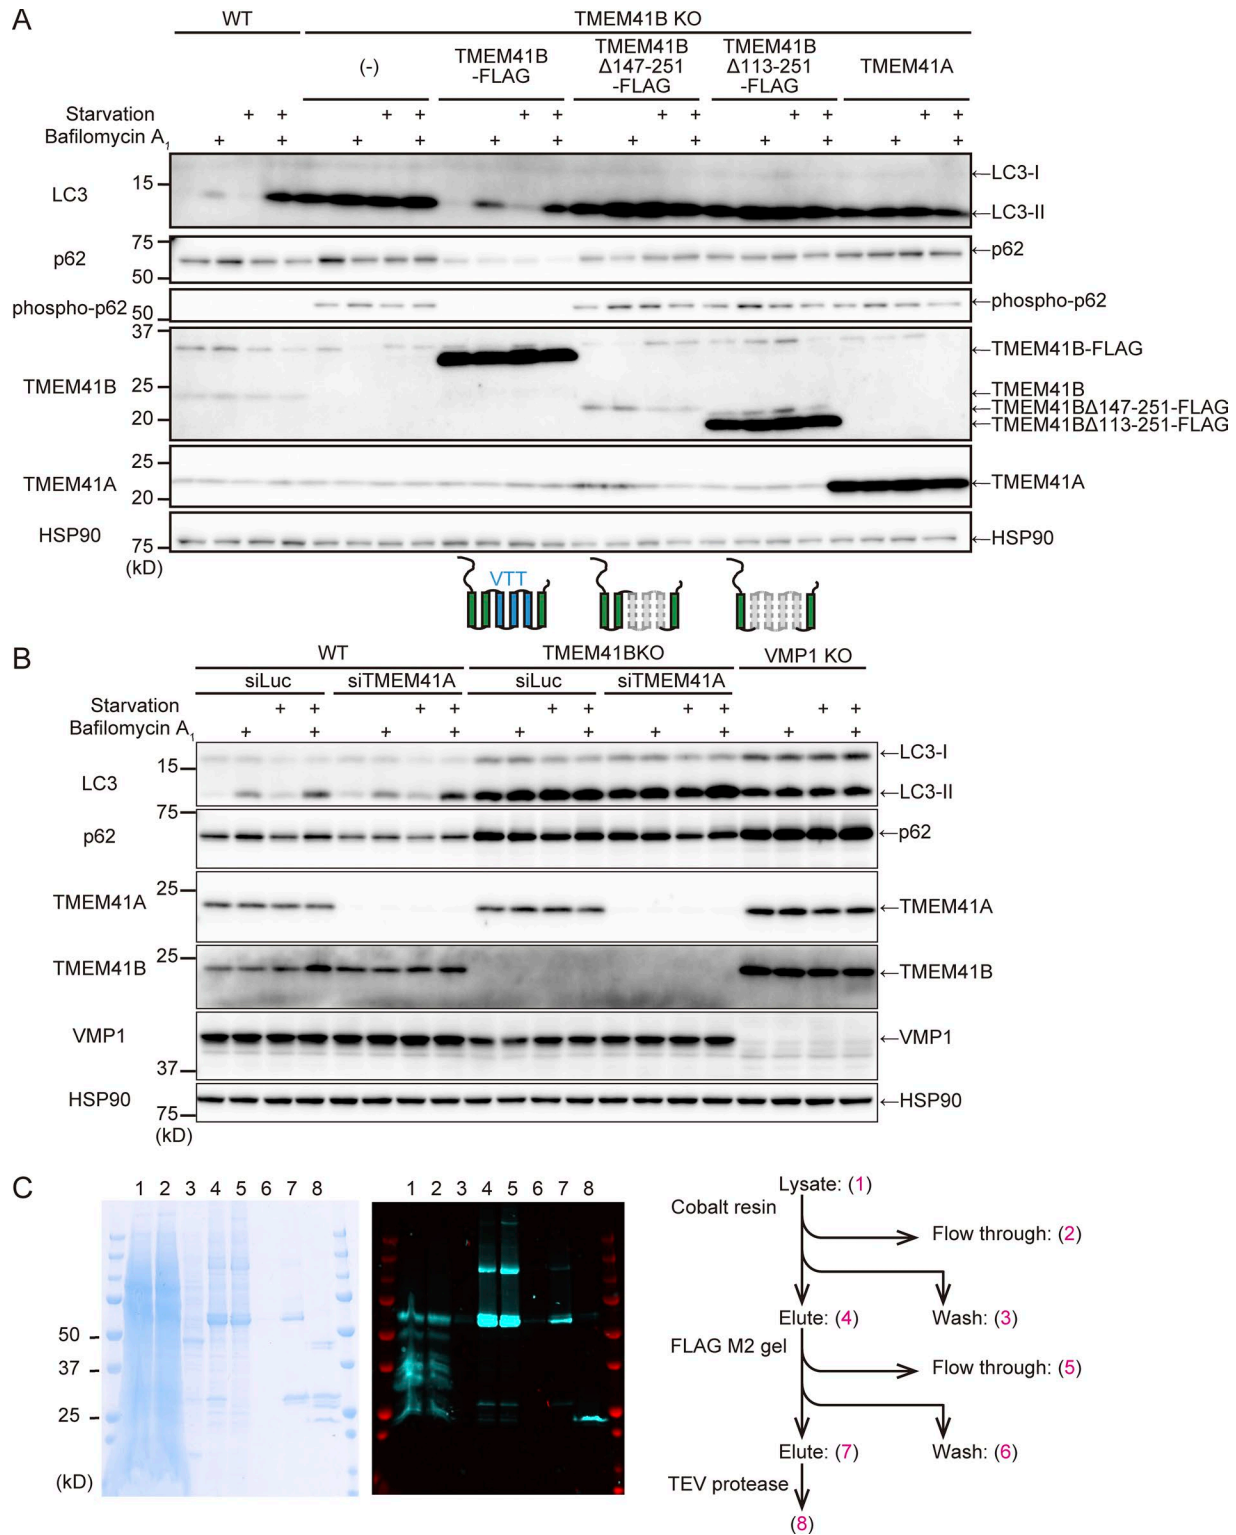

Figure S2. **Requirement of the VTT domain and TMEM41B for autophagy and purification of TMEM41B and VMP1.** (A) TMEM41B-KO cells stably expressing TMEM41B-FLAG, TMEM41B-FLAG lacking the VTT domain (TMEM41B $\Delta$ 147-251 and TMEM41B $\Delta$ 113-251), and exogenous TMEM41A were cultured with or without bafilomycin A<sub>1</sub> under nutrient-rich or starvation conditions for 2 h. (B) WT and TMEM41B-KO cells were transfected twice with siLuciferase (siLuc) or siTMEM41A. After 2 d, cells were cultured with or without bafilomycin A<sub>1</sub> under nutrient-rich or starvation conditions for 2 h. (C) VMP1-TEV-GFP-His and TMEM41B-FLAG were coexpressed in Sf9 cells. The VMP1-TMEM41B complex was purified by cobalt-affinity chromatography followed by FLAG M2 affinity chromatography. The left panel shows CBB-stained SDS-PAGE, and the right panel shows in-gel fluorescence signals of GFP (460 nm) and markers (630 nm) colored with cyan and magenta, respectively.

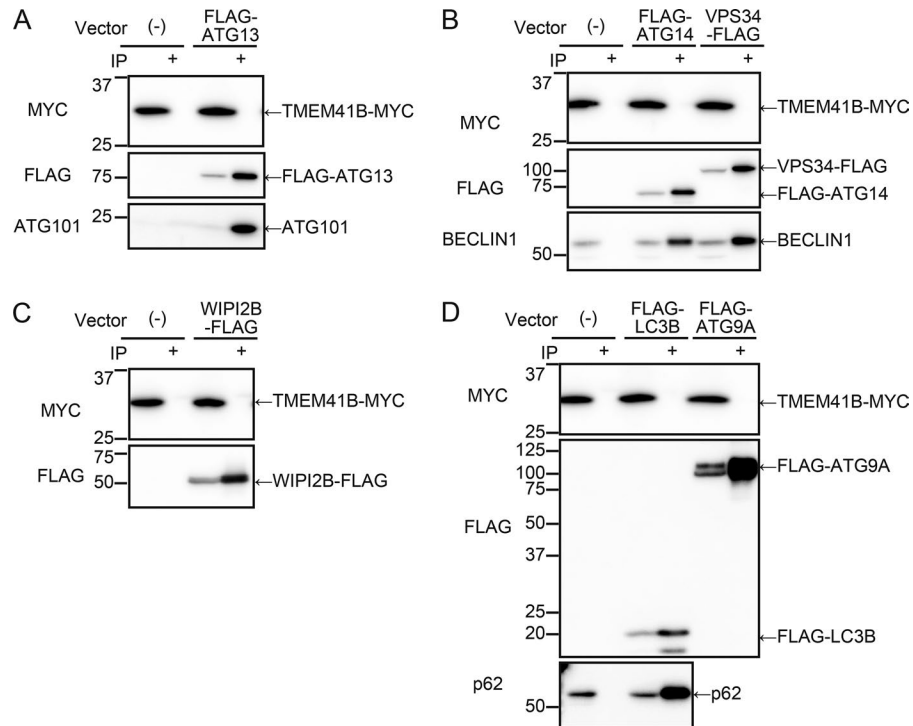

Figure S3. **TMEM41B does not interact with core ATG proteins. (A–D)** HEK293T cells stably expressing MYC-tagged TMEM41B were transfected with FLAG-tagged ATG13 (A), ATG14, VPS34 (B), WIPI2B (C), LC3B, or ATG9A (D), and their lysates were subjected to IP using anti-FLAG antibody-conjugated Sepharose beads. Molecular masses are given in kilodaltons.

Table S1 is a separate Excel file showing results of the genome-wide pooled CRISPR screen.
